# Supplementary material for: Serum Level of Cytokeratin 18 (M65) as a Prognostic Marker of High Cardiovascular Disease Risk in Individuals with Non-Alcoholic Fatty Liver Disease
Source: MDPI journal article supplement (doi:10.3390/biom13071128), 2023-07-14
Supplement: s1 [file s1]

## Supplemental tables

**Table S1.** Performance of CK18 (categorical or continuous value) in predicting FLI $\geq$ 60 in PREVENT participants.

| All PREVENT participants (n=312) |       |             |         |                     |             |         |                       |             |         |
|----------------------------------|-------|-------------|---------|---------------------|-------------|---------|-----------------------|-------------|---------|
| Discriminant accuracy            |       |             |         | Univariate analysis |             |         | Multivariate analysis |             |         |
| Predictor                        | AUC   | 95% CI      | P-value | OR                  | 95% CI      | P-value | OR                    | 95% CI      | P-value |
| M30                              | 0.702 | 0.641-0.762 | <0.0001 | 1.004               | 1.002-1.006 | 0.0002  | 1.002                 | 0.99-1.004  | 0.10    |
| M65                              | 0.657 | 0.59-0.719  | <0.0001 | 1.004               | 1.002-1.006 | <0.0001 | 1.003                 | 1.000-1.005 | 0.004   |
| M30>200                          | -     | -           | -       | 3.42                | 2.11-5.56   | <0.0001 | 3.22                  | 1.92-5.39   | <0.0001 |
| M65>400                          | -     | -           | -       | 2.61                | 1.18-5.75   | 0.01    | 1.35                  | 0.58-3.14   | 0.48    |

AUC: area under the curve; OR: odds ratio; CI: confidence interval; CK: Cytokeratin.

AUC non calculated for CK18 categorical values. In multivariate analysis, only M30 M65 were considered in the model.

**Table S2.** P-value for Spearman's rank correlation between levels of CK18 (M30 and M65) and clinical characteristics of PREVENT participants.

| Variable            | All PREVENT participants (n=312) |         | FLI $\geq$ 60 PREVENT participants (n=112) |         | FLI<60 PREVENT participants (n=200) |         |
|---------------------|----------------------------------|---------|--------------------------------------------|---------|-------------------------------------|---------|
|                     | M30                              | M65     | M30                                        | M65     | M30                                 | M65     |
|                     | P-value                          | P-value | P-value                                    | P-value | P-value                             | P-value |
| Age                 | <0.0001                          | <0.0001 | 0.15                                       | 0.006   | 0.03                                | 0.009   |
| Waist circumference | <0.0001                          | <0.0001 | 0.89                                       | 0.87    | 0.01                                | 0.30    |
| Weight              | <0.0001                          | 0.01    | 0.08                                       | 0.09    | 0.18                                | 0.37    |
| BMI                 | <0.0001                          | 0.008   | 0.38                                       | 0.51    | 0.66                                | 0.57    |
| DBP                 | 0.01                             | 0.36    | 0.43                                       | 0.26    | 0.54                                | 0.92    |
| SBP                 | <0.0001                          | 0.0004  | 0.01                                       | 0.03    | 0.02                                | 0.22    |
| Total -c            | 0.06                             | 0.04    | 0.001                                      | 0.001   | 0.97                                | 0.98    |
| LDL-c               | 0.01                             | 0.02    | <0.0001                                    | 0.001   | 0.89                                | 0.94    |
| HDL-c               | 0.002                            | 0.01    | 0.74                                       | 0.83    | 0.50                                | 0.88    |
| TG                  | <0.0001                          | 0.003   | 0.6                                        | 0.75    | 0.14                                | 0.42    |
| Plasma glucose      | <0.0001                          | <0.0001 | 0.02                                       | 0.005   | 0.02                                | 0.002   |
| ALP                 | 0.001                            | 0.01    | 0.03                                       | 0.09    | 0.15                                | 0.19    |
| ALT                 | 0.0001                           | 0.0004  | 0.0008                                     | 0.003   | 0.44                                | 0.37    |
| AST                 | <0.0001                          | <0.0001 | <0.0001                                    | <0.0001 | 0.0005                              | 0.001   |
| GGT                 | <0.0001                          | <0.0001 | <0.0001                                    | 0.0006  | 0.003                               | 0.0003  |
| FLI                 | <0.0001                          | <0.0001 | 0.05                                       | 0.14    | 0.004                               | 0.09    |
| FRS                 | 0.0001                           | 0.0006  | 0.17                                       | 0.03    | 0.15                                | 0.23    |
